## **NEURAL AND BEHAVIORAL CORRELATES OF EDIBLE CANNABIS-INDUCED POISONING: CHARACTERIZING A NOVEL PRECLINICAL MODEL**

Richard Quansah Amissah, PhD,<sup>1</sup> Hakan Kayir, PhD,<sup>1</sup> Malik Asfandyaar Talhat, BSc,<sup>1</sup> Ahmad Hassan,<sup>1</sup> Yu Gu, PhD,<sup>1</sup> Ron Johnson, PhD,<sup>1</sup> Karolina Urban, PhD,<sup>2</sup> Jibrán Y. Khokhar, PhD<sup>1,3</sup>

<sup>1</sup> Department of Biomedical Sciences, Ontario Veterinary College, University of Guelph, Guelph, Ontario, Canada

<sup>2</sup> Avicanna Inc., Toronto, Canada

<sup>3</sup> Department of Anatomy and Cell Biology, Schulich School of Medicine and Dentistry, Western University, London, Ontario, Canada.

Corresponding Author: Jibrán Khokhar

Telephone: 519.661.2111 Ext. 81524

Email: [jkhokha@uwo.ca](mailto:jkhokha@uwo.ca)

## ABSTRACT

Accidental exposure to  $\Delta^9$ -tetrahydrocannabinol (THC)-containing edible cannabis, leading to cannabis poisoning, is common in children and pets; however, the neural mechanisms underlying these poisonings remain unknown. Therefore, we examined the effects of acute edible cannabis-induced poisoning on neural activity and behavior. Adult Sprague-Dawley rats (6 males, 7 females) were implanted with electrodes in the prefrontal cortex (PFC), dorsal hippocampus (dHipp), cingulate cortex (Cg), and nucleus accumbens (NAc). Cannabis poisoning was then induced by exposure to a mixture of Nutella (6 g/kg) and THC-containing cannabis oil (20 mg/kg). Subsequently, cannabis tetrad and neural oscillations were examined 2, 4, 8, and 24 h after THC exposure. In another cohort (16 males, 15 females), we examined the effects of cannabis poisoning on learning and prepulse inhibition, and the serum and brain THC and 11-hydroxy-THC concentrations. Cannabis poisoning resulted in sex differences in brain and serum THC and 11-hydroxy-THC levels over a 24-h period. It also caused gamma power suppression in the Cg, dHipp, and NAc in a sex- and time-dependent manner. Cannabis poisoning also resulted in hypolocomotion, hypothermia, and anti-nociception in a time-dependent manner and impairments in learning and prepulse inhibition. Our results suggest that the impairments in learning and information processing may be due to the decreased gamma power in the dHipp and PFC. Additionally, most of the changes in neural activity and behavior appear 2 hours after ingestion, suggesting that interventions at or before this time might be effective in reversing or reducing the effects of cannabis poisoning.

## INTRODUCTION

Cannabis is mostly consumed through smoking and inhalation [1, 2]; however, the patronage of edible cannabis, a product consumed by ingestion, has increased in recent times [3-5]. This has resulted in an uptick in accidental cannabis poisoning cases among children and pets [6-9], who mistake edible cannabis for other cannabis-free foods [10]. Moreover, edible cannabis is the most common cannabis product associated with cannabis poisoning in children and pets [11-13], emphasizing the need to investigate the effects of edible cannabis-induced poisoning. In children and pets, most clinical signs of cannabis poisoning are neurological [14, 15], occurring due to the interaction between  $\Delta^9$ -tetrahydrocannabinol (THC) and type 1 cannabinoid receptors (CB1Rs) expressed in brain regions including the cingulate cortex (Cg), prefrontal cortex (PFC), hippocampus, and nucleus accumbens (NAc). The THC in edible cannabis is metabolized into 11-hydroxy- $\Delta^9$ -tetrahydrocannabinol (11-OH-THC) [16], which might be more potent than THC [17, 18] and cause stronger and longer lasting effects [19]. Oral THC administration also results in high brain THC levels [20], which may contribute to the high incidence of edible cannabis-induced poisoning [21].

Intraperitoneal THC administration causes decreased theta and gamma power in the rat hippocampus, a brain region critical for learning [22], possibly through the inhibition of presynaptic neurotransmitter release [23]. Gamma oscillations are necessary for associative learning, and therefore, their alteration may lead to cognitive deficits [24, 25]. THC vapor administration also resulted in decreased gamma power in the rat dorsal striatum, orbitofrontal cortex, and PFC, regions implicated in the cognitive and psychotic effects of THC [26]. While THC inhalation and injection leads to decreased brain oscillations, few studies have investigated similar effects following edible cannabis consumption. Information processing, evaluated as prepulse inhibition (PPI) in the acoustic startle reflex test (ASR) [27, 28], is

impaired in cannabis users [29, 30], and could be used to understand the impact of cannabis poisoning on sensorimotor gating. In rodents, THC administration affects PPI [31-34]. Learning deficits can also be evaluated using the active avoidance task (AAT), and in animal models, acute THC administration causes poor AAT performance [35]. Edible cannabis poisoning may also produce such deficits. While THC exposure via vapor, injection, and gavage induces specific behavioral effects referred to as the cannabis tetrad, which includes catalepsy, hypolocomotion, hypothermia, and anti-nociception [36-38], few studies have evaluated similar behavioral effects using edible cannabis [39, 40]. Sex differences in sensitivity to the effects of THC [41, 42] and its metabolism [43] exist, therefore, it may be worth investigating these differences with respect to edible cannabis poisoning.

This is an important topic given that most patients who report to the emergency unit due to cannabis poisoning report consuming edible cannabis [44]. Understanding the underlying neural mechanisms and the pharmacokinetics of THC via edible consumption could help identify effective treatments for cannabis poisoning. Therefore, the objectives of this study were to investigate the effects of acute high-dose THC via edible administration on neural activity, behavior, and serum and brain THC and 11-OH-THC levels over a 24-h period.

## **MATERIALS AND METHODS**

Detailed description of the study methods can be found in the online Supplementary Material section. Two adult male and female Sprague Dawley rat cohorts were used to develop a novel preclinical model for cannabis poisoning using a commercially available full-spectrum THC cannabis oil. The first cohort underwent surgery to implant electrodes in the dorsal hippocampus (dHipp), PFC, Cg, and NAc followed by neural activity recording and tests to evaluate the cannabis tetrad 2, 4, 8, and 24 h after cannabis poisoning. The second cohort

underwent tests including the ASR to evaluate PPI and AAT to evaluate learning. Saphenous vein blood samples were collected from this group 4, 8, and 24 h after cannabis poisoning for serum THC and 11-OH-THC levels evaluation. They were subsequently euthanized for assessment of brain THC and 11-OH-THC levels 24 h after cannabis poisoning. The timeline for the experiments is described in Fig. S1. All procedures were in accordance with guidelines set by the University of Guelph Animal Care Committee and guidelines in the Guide to the Care and Use of Experimental Animals.

## RESULTS

### **Serum and brain THC and 11-OH-THC levels following edible cannabis-induced poisoning**

There was a significant main effect of sex ( $F(1,29)=21.05$ ,  $p<0.0001$ ), but not time after N-THC consumption (time) ( $F(2,58)=2.192$ ,  $p=0.1208$ ) and sex x time interaction ( $F(2,58)=0.8209$ ,  $p=0.4451$ ), on serum THC concentrations. In males, the THC concentration at all time-points were similar (Fig. 1A). In females, the THC concentration at the 4-h time-point was higher than that at the 24-h ( $p=0.0463$ ) time-point. Moreover, the THC concentration in females was higher than that in males at the 4-h time-point ( $p=0.0019$ ), but not the other time-points. There were significant main effects of sex ( $F(1,29)=86.00$ ,  $p<0.0001$ ), time ( $F(2,58)=23.86$ ,  $p<0.0001$ ), and their interaction ( $F(2,58)=21.25$ ,  $p<0.0001$ ) on the serum 11-OH-THC concentration. In males, there were no time-related differences in 11-OH-THC concentration, while in females, the 11-OH-THC concentration at the 4-h time-point was higher than those at the 8-h ( $p=0.0220$ ) and 24-h ( $p<0.0001$ ) time-points (Fig. 1B). Additionally, the 11-OH-THC concentration in females was higher than that in males at the 4-h ( $p<0.0001$ ) and 8-h ( $p<0.0001$ ) time-points, but not the 24-h time-point. Comparison using

the t-test revealed higher brain THC and 11-OH-THC levels in females ( $p=0.0159$  and  $p=0.0085$ , respectively) compared to males at the 24-h time-point (Fig. 1C and D).

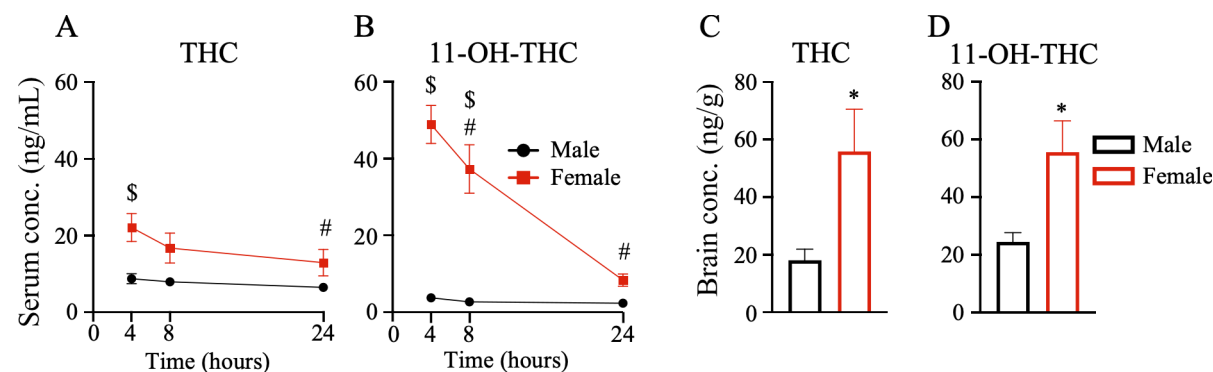

Figure 1. Concentrations of THC and 11-OH-THC in the serum and brain of rats following edible cannabis -induced poisoning. A and B. Serum THC and 11-OH-THC concentrations in males and females at the 4-, 8-, and 24-h time-points. The serum THC and 11-OH-THC concentrations in females were generally higher than those in males. C and D. Brain THC and 11-OH-THC levels in males and females at the 24-h time-point. The brain THC and 11-OH-THC levels in females were higher than those in males. Filled black circles: Male THC/11-OH-THC, filled red squares: female THC/11-OH-THC. \$: comparison between males and females at different time-points with  $p<0.05$ . #: comparison of concentration at other time-points with that at the 4-h time-point in females with  $p<0.05$ . \*: comparison of concentration of THC/11-OH-THC in the brain between males and females with  $p<0.05$ .

### Effects of edible cannabis-induced poisoning on gamma oscillations

Although N-THC consumption had some effect on delta, theta, and beta oscillations, the low and high gamma oscillations were the most consistently affected. Therefore, only the results for the effects of acute high-dose THC via edible administration on PFC, dHipp, Cg, and NAc gamma oscillations at the different time-points (Fig. 2) will be described.

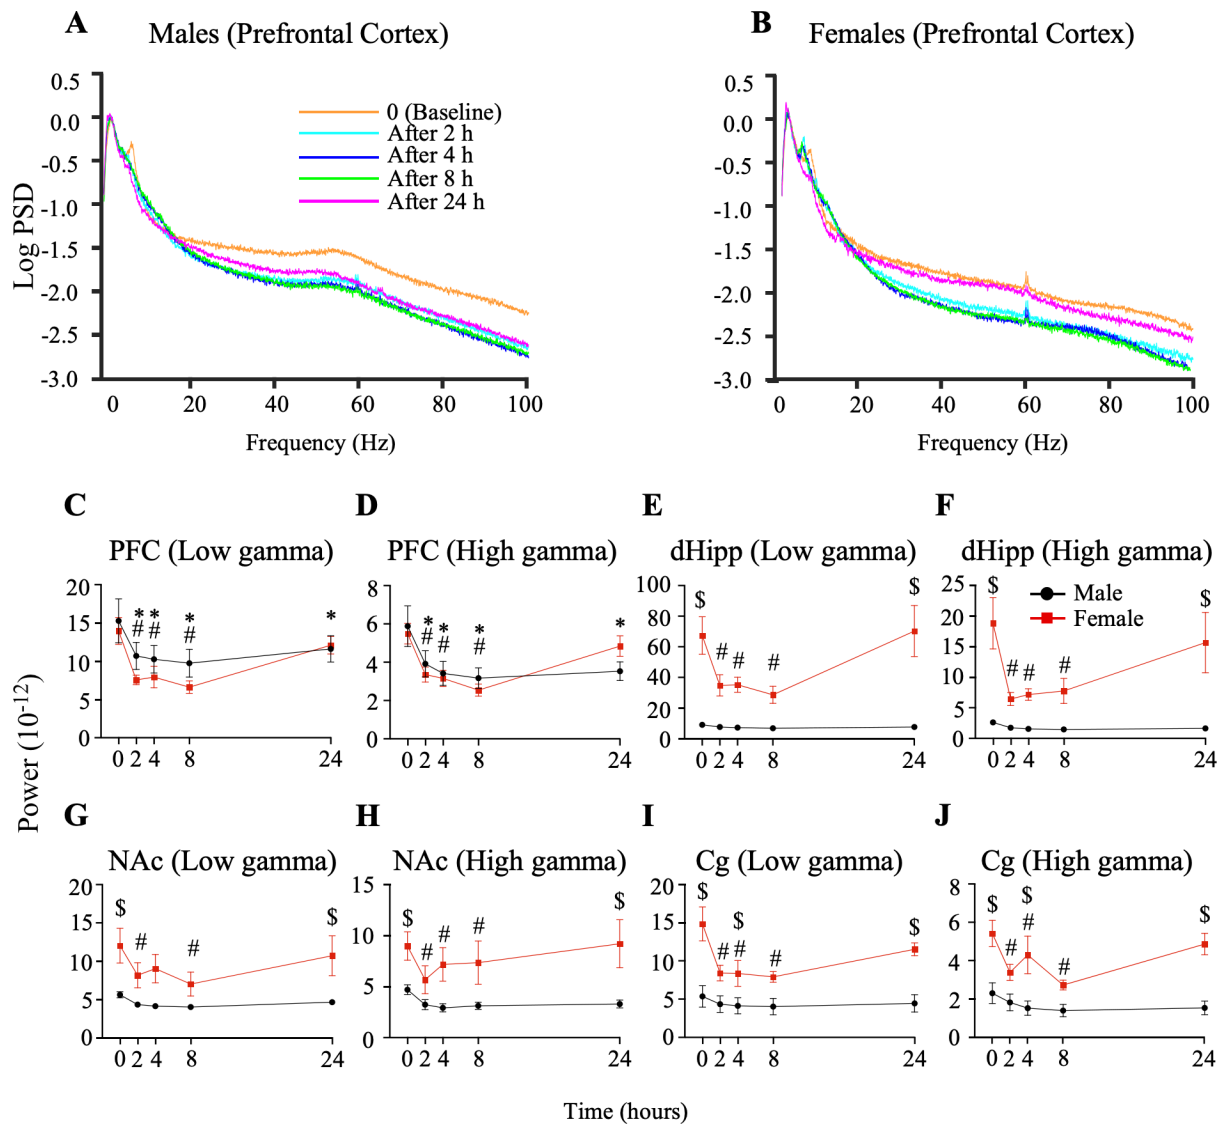

Figure 2. Power spectral density (PSD) plot for male and female rats after edible cannabis-induced poisoning. Representative log-transformed prefrontal cortex (PFC) PSD in male (A) and female rats (B) at each time-point. Orange plot: Baseline, cyan plot: 2-h time-point, blue plot: 4-h time-point, green plot: 8-h time-point, and pink plot: 24-h time-point. C and D. Low and high gamma power, respectively, in the PFC between males and females at different time-points. The low and high gamma power in the PFC of male and female rats were generally not different at the targeted time-points. E and F. Low and high gamma power, respectively, in the dorsal hippocampus (dHipp) of males and female rats at different time-points. G and H. Low and high gamma power, respectively, in the nucleus accumbens (NAc) of males and female

rats at different time-points. I and J. Low and high gamma power, respectively, in the cingulate cortex (Cg) between males and females at different time-points. In general, the low and high gamma power in the dHipp, Cg, and NAc of females were higher than those in males (E – J). §: comparison of time-points between sexes with  $p < 0.05$ , \*: comparison of power at other time-points with that at baseline in males with  $p < 0.05$ , #: comparison of power at other time-points with that at baseline in females with  $p < 0.05$ .

In the PFC, while the main effects of sex ( $F(1,24)=0.7462$ ,  $p=0.3962$ ) and its interaction with time ( $F(4,96)=1.946$ ,  $p=0.1093$ ) on the low gamma (LG) power were not significant, that for time ( $F(4,96)=17.59$ ,  $p=0.0001$ ) was significant. Moreover, the LG power was similar in males and females at all time-points (Fig. 2A-D). However, in males the LG power at the 2-h ( $p=0.0035$ ), 4-h ( $p=0.0012$ ), 8-h ( $p=0.0003$ ), and 24-h ( $p=0.028$ ) time-points were lower than that at baseline. In females, with the exception of the 24-h LG power, the 2-h ( $p < 0.0001$ ), 4-h ( $p < 0.0001$ ), and 8-h ( $p < 0.0001$ ) LG power was lower than that at baseline. The main effect of sex on high gamma (HG) power in the PFC ( $F(1,24)=0.02193$ ,  $p=0.8835$ ) was not significant; however, that for the time ( $F(4,96)=23.42$ ,  $p < 0.0001$ ) and its interaction with sex ( $F(4,96)=3.169$ ,  $p=0.0171$ ) were significant. Additionally, the PFC HG power at baseline and at all time-points were similar in males and females (Fig. 2A-D). The HG power at the 2-h ( $p=0.002$ ), 4-h ( $p < 0.0001$ ), 8-h ( $p < 0.0001$ ), and 24-h ( $p < 0.0001$ ) time-points were lower than that at baseline in males. In females, the HG power at the 2-h ( $p < 0.0001$ ), 4-h ( $p < 0.0001$ ), and 8-h ( $p < 0.0001$ ) time-points, but not the 24-h time-point, was lower than that at baseline.

Significant main effects of sex ( $F(1,24)=24.40$ ,  $p < 0.0001$ ), time ( $F(4, 96)=5.540$ ,  $p=0.0005$ ), and their interaction ( $F(4,96)=4.897$ ,  $p=0.0012$ ) on dHipp LG power were observed. Moreover, while the LG power at baseline ( $p < 0.0001$ ) and the 24-h time-point ( $p < 0.0001$ ) were higher in



females, it was similar between sexes at the other time-points (Fig. 2E). Furthermore, the LG power at the other time-points were not different from that at baseline in males. In females, however, with the exception of the 24-h LG power, the LG power at the 2-h ( $p=0.0007$ ), 4-h ( $p=0.0009$ ), and 8-h ( $p<0.0001$ ) time-points were lower than baseline. Similarly, the main effects of sex ( $F(1,24)=14.38$ ,  $p=0.0009$ ), time ( $F(4,96)=5.5$ ,  $p=0.0005$ ), and their interaction ( $F(4,96)=4.294$ ,  $p=0.0031$ ) on dHipp HG power were significant. Even though the HG power in both sexes were similar at the 2-h, 4-h, and 8-h time-points, those at baseline ( $p<0.0001$ ) and the 24-h ( $p=0.0002$ ) time-point were higher in females (Fig. 2F). In females, but not males, the baseline HG power was higher than those at the 2-h ( $p<0.0001$ ), 4-h ( $p<0.0001$ ), and 8-h ( $p=0.0001$ ) time-points. The one-way RM ANOVA revealed that in males, the baseline LG power was higher than that at the 4-h ( $p=0.0118$ ) and 8-h ( $p=0.0044$ ) time-points, but not different from those at the 2-h and 24-h time-points (Fig. S2A), while the HG power at the 2-h ( $p=0.0011$ ), 4-h ( $p<0.0001$ ), 8-h ( $p<0.0001$ ), and 24-h ( $p<0.0001$ ) were lower than that at baseline (Fig. S2B).

The main effects of sex ( $F(1,24)=8.994$ ,  $p=0.0062$ ) and time ( $F(4,96)=4.122$ ,  $p=0.0041$ ), but not their interaction ( $F(4,96)=1.479$ ,  $p=0.2151$ ), on NAc LG power were significant. The LG power at baseline ( $p=0.0109$ ) and the 24-h ( $p=0.0071$ ) time-point were higher in females than in males, but not different at the 2-h, 4-h, and 8-h time-points (Fig. 2G). In males, the LG power at all time-points were similar; however, in females, the LG power at the 2-h ( $p=0.0130$ ) and 8-h ( $p=0.0009$ ) time-points were higher than that at baseline, while those at the 4-h and 24-h time-points were not. The sex ( $F(1,24)=5.544$ ,  $p=0.0271$ ) and time ( $F(4,96)=7.510$ ,  $p<0.0001$ ), but not their interaction ( $F(4,96)=1.578$ ,  $p=0.1867$ ), had significant main effects on the NAc HG power. Females had higher HG power at baseline ( $p=0.0357$ ) and the 24-h ( $p=0.0384$ ) time-point than males, but similar HG power to males at the other time-points (Fig. 2H).

Additionally, the HG power at baseline in males was similar to those at other time-points. In females, the HG power at the 2-h ( $p=0.0002$ ), 4-h ( $p<0.0001$ ), and 8-h ( $p=0.0002$ ) time-points, but not the 24-h time-point, were higher than that at baseline. In the male NAc, the one-way RM ANOVA revealed that, with the exception of the 24-h LG power, the LG power at the 2-h ( $p=0.0158$ ), 4-h ( $p=0.0028$ ), and 8-h ( $p=0.0018$ ) time-points were lower than that at baseline (Fig. S2C). The baseline HG power in males was not different from that at the 2-h time-point but higher than those at the 4-h ( $p=0.0002$ ), 8-h ( $p=0.008$ ), and 24-h ( $p=0.0002$ ) time-points (Fig. S2D).

Significant main effects of sex ( $F(1,24)=14.69$ ,  $p=0.0008$ ), time ( $F(4,96)=8.707$ ,  $p<0.0001$ ), and their interaction ( $F(4,96)=4.506$ ,  $p=0.0023$ ) on Cg LG power were observed. Compared to males, the LG power in females were higher at baseline ( $p<0.0001$ ) and the 24-h time-point ( $p=0.0002$ ), but not different at the remaining time-points (Fig. 2I). Moreover, while the LG power at baseline was similar to that at the other time-points in males, the LG power at baseline was higher than that at the 2-h ( $p<0.0001$ ), 4-h ( $p<0.0001$ ), and 8-h ( $p<0.0001$ ) time-points, but not the 24-h time-point, in females. Similarly, there were significant main effects of sex ( $F(1,24)=14.92$ ,  $p=0.0007$ ), time ( $F(4,96)=7.109$ ,  $p<0.0001$ ), and their interaction ( $F(4,96)=3.107$ ,  $p=0.0190$ ) on the Cg HG power. Moreover, while the HG power at the 2-h and 8-h time-points were not different in both sexes, it was lower in males compared to females at baseline ( $p=0.0004$ ) and at the 4-h ( $p=0.0048$ ) and 24-h ( $p=0.0001$ ) time-points (Fig. 2J). Males had similar HG power at all time-points when compared to baseline, while females had HG power at baseline that was higher than that at the 2-h ( $p=0.0006$ ), 4-h ( $p=0.0429$ ), and 8-h ( $p<0.0001$ ) time-points, but not the 24-h time-point. The one-way RM ANOVA revealed that, in males, while the Cg LG power at baseline was not different from that at the other time-points (Fig. S2E), the HG power at baseline was not different from that at the 2-h time-point, but

higher than those at the 4-h ( $p=0.0137$ ), 8-h ( $p=0.0344$ ), and 24-h ( $p=0.0320$ ) time-points (Fig. S2F).

The coherence between pairs of brain regions within the gamma frequency ranges was also evaluated. However, unlike the power spectral density analysis, the results (Fig. S3) were inconsistent and will not be described.

### **Effects of edible cannabis-induced poisoning on tetrad behavior**

While we evaluated the four cannabis tetrad behaviors [38], there were no observable cataleptic effects of cannabis poisoning in both sexes; therefore, results will only be presented for hypolocomotion, hypothermia, and anti-nociception.

There were significant main effects of time ( $F(4,44)=26.91$ ,  $p<0.0001$ ) and sex x time ( $F(4,44)=3.295$ ,  $p=0.0191$ ) on rectal body temperature, with the cannabis exposed animals showing a hypothermia phenotype. Moreover, in males, while the body temperatures at the 2-h ( $p=0.0143$ ), 4-h ( $p<0.0001$ ), 8-h ( $p<0.0001$ ), and 24-h ( $p=0.0029$ ) time-points were decreased compared to that at baseline, in females, the rectal temperatures were decreased at the 2-h ( $p=0.0064$ ), 4-h ( $p<0.0001$ ), and 8-h ( $p<0.0001$ ) time-points, but not the 24-h time-point (Fig. 3A). Additionally, the 24-h time-point rectal temperature of females was higher than that of males ( $p=0.014$ ).

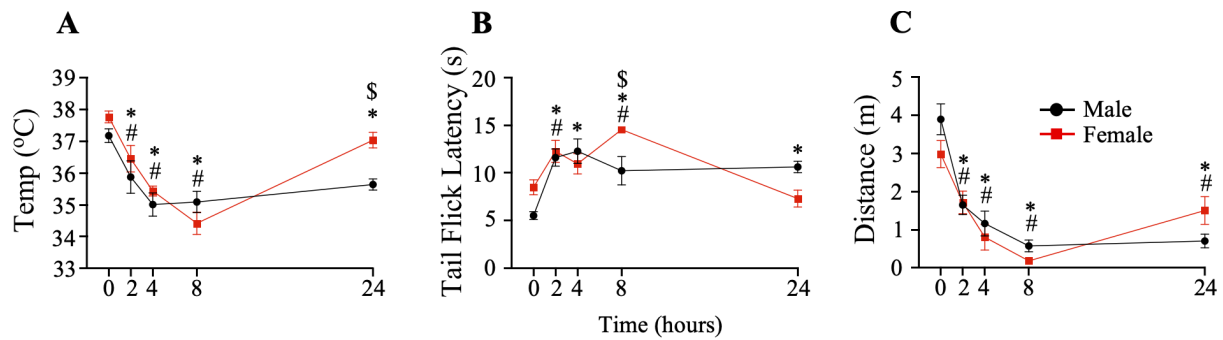

Figure 3. Edible cannabis-induced effects on body temperature, anti-nociception and locomotion in male and female rats. A. Graph comparing the rectal temperatures of males and females measured at the time-points of interest following edible cannabis-induced poisoning. While the rectal temperature at the different time points were different when compared to baseline within male rats and within female rats, the rectal temperature was not different at all time points when male rats were compared to female rats. B. Graph comparing the latency to tail flick of males and females at the time-points of interest following edible cannabis-induced poisoning. While the tail flick latency (anti-nociception) at the different time points when compared to baseline were different within male rats and within female rats, the tail flick latency was not different at all time points when male rats were compared to female rats. C. Graph comparing the total distance traveled by males and females in the open field box at the time-points of interest following edible cannabis-induced poisoning. While the distance traveled in the open field box at the different time points when compared to baseline were different within male rats and within female rats, the distance traveled was not different at all time points when male rats were compared to female rats. \$: comparison of outcome at different time-points between sexes with  $p < 0.05$ , \*: comparison of outcome at other time-points with that at baseline in males with  $p < 0.05$ , #: comparison of outcome at other time-points with that at baseline in females with  $p < 0.05$ .

There were significant main effects of time ( $F(4,44)=11.92$ ,  $p<0.0001$ ) and sex x time interaction ( $F(4,44)=5.517$ ,  $p=0.001$ ) on edible cannabis-induced anti-nociception. The latency to tail flick in males was longer at the 2-h ( $p=0.0003$ ), 4-h ( $p<0.0001$ ), 8-h ( $p=0.0067$ ), and 24-h ( $p=0.003$ ) time-points compared to baseline. In females, the tail flick latency was longer at the 2-h ( $p=0.0209$ ) and 8-h ( $p<0.0001$ ) time-points but not at the 4-h and 24-h time-points (Fig. 3B). Moreover, the tail flick latency of females was longer compared to males after 8 h ( $p=0.0091$ ) and tended to be shorter than that in males at the 24-h ( $p=0.0743$ ) time-point.

There was a significant main effect of time on displacement (distance traveled) ( $F(4,44)=32.90$ ,  $p<0.0001$ ), with animals showing hypolocomotion after edible cannabis exposure. However, the main effect of sex ( $F(1,11)=0.5725$ ,  $p=0.4652$ ) was not significant, while that for the sex x time interaction ( $F(4,44)=2.453$ ,  $p=0.0598$ ) trended toward significance. Additionally, compared to displacement at baseline, the displacement of both males and females at the 2-h (male:  $p<0.0001$ , female:  $p=0.0092$ ), 4-h (male:  $p<0.0001$ , female:  $p<0.0001$ ), 8-h (male:  $p<0.0001$ , female:  $p<0.0001$ ), and 24-h (male:  $p<0.0001$ , female:  $p=0.0019$ ) time-points were decreased (Fig. 3C).

### **Effects of edible cannabis-induced poisoning on active avoidance learning and prepulse inhibition**

In the AAT, the three-way ANOVA revealed significant main effects of trial block ( $F(4.322,109.5)=30.14$ ,  $p<0.0001$ ), treatment (control vs THC groups;  $F(1,26)=15.94$ ,  $p=0.0005$ ), trial block x treatment interaction ( $F(6,152)=10.29$ ,  $p<0.0001$ ), and trial block x sex interaction ( $F(6,152)=4.318$ ,  $p=0.0005$ ) on percentage avoidance. There were no significant main effects of sex, sex x treatment interaction, or trial block x treatment x sex interaction on percent avoidance. We subsequently performed a two-way ANOVA in males which revealed

significant main effects of trial block ( $F(6,78)=7.037$ ,  $p<0.0001$ ), treatment ( $F(1,13)=4.701$ ,  $p=0.0493$ ), and their interaction ( $F(6,78)=3.396$ ,  $p=0.0050$ ) on the percentage avoidance (Fig. 4A). The percentage avoidance in control rats during trial blocks 5 ( $p=0.0474$ ) and 7 ( $p=0.0098$ ) was higher than that in THC rats but not different during trial blocks 1, 2, 3, 4, and 6. In females, the two-way ANOVA revealed significant main effects of trial block ( $F(6,74)=27.47$ ,  $p<0.0001$ ), treatment ( $F(1,13)=12.79$ ,  $p=0.0034$ ), and their interaction ( $F(6,74)=7.552$ ,  $p<0.0001$ ) on the percentage avoidance. While the percentage avoidance in female control rats during trial blocks 1, 2, 3, and 4 was not different from that for female THC rats, it was higher than that of female THC-exposed rats during trial blocks 5 ( $p<0.0001$ ), 6 ( $p=0.0004$ ), and 7 ( $p=0.0001$ ) (Fig. 4B).

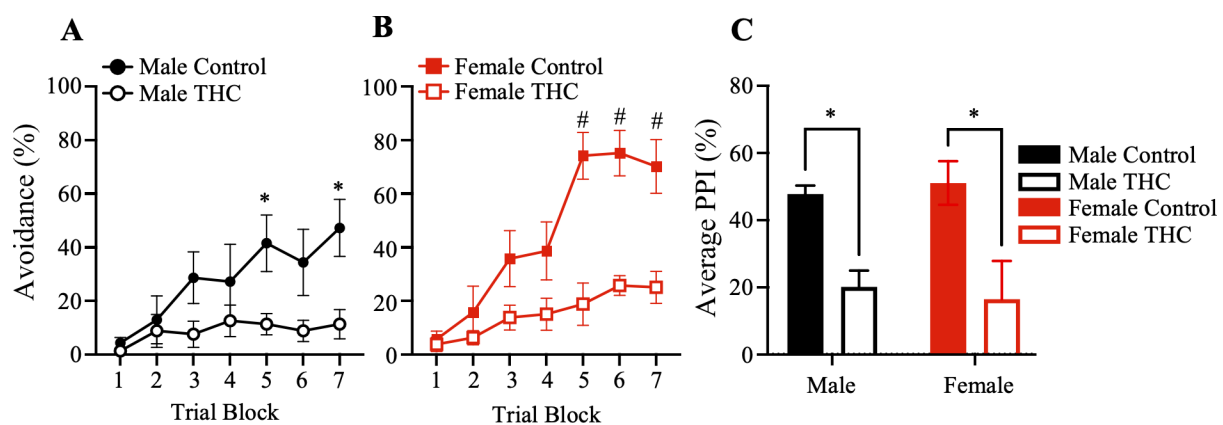

Figure 4. Both active avoidance and prepulse inhibition are disrupted by edible cannabis poisoning. A. Graph comparing the percentage avoidance among male control and THC rats. The percentage avoidance of male control rats was higher than that of male THC rats during trial blocks 5 and 7. Filled black circle: male control rats, empty black circle: male THC rats. B. Graph comparing the percentage avoidance among female control and THC rats. The percentage avoidance of female control rats was higher than that of female THC rats during trial blocks 5, 6, and 7. Filled red square: female control rats, empty red square: female THC rats. \*: comparison of percentage avoidance for different trials between male control rats and

male THC rats with  $p < 0.05$ , #: comparison of percentage avoidance for different trials between female control rats and female THC rats with  $p < 0.05$ . C. Graph comparing average percentage PPI among male and female control and THC rats. The average percentage PPI in both male and female THC rats was lower than those of their corresponding control rats. Filled black bar: male control rats, empty black bar: male THC rats, filled red bar: female control rats, empty red bar: female THC rats. \*: comparison between control and THC rats with  $p < 0.05$ .

During the two-way ANOVA analysis of the percentage PPI, no difference in the effect of sound intensity on the percentage PPI was observed in both sexes (results not shown); the percentage PPI for the three intensities were therefore averaged and analyzed. While the main effects of sex ( $F(1,14)=0.001341$ ,  $p=0.9713$ ) and sex x treatment interaction ( $F(1,14)=0.3888$ ,  $p=0.5429$ ) on percentage PPI were not significant, that for treatment was significant ( $F(1,14)=13.92$ ,  $p=0.0022$ ). Moreover, in both sexes, the averaged percentage PPI for control rats were higher than that for THC exposed rats (male:  $p=0.0209$ , female:  $p=0.0037$ ) (Fig. 4C).

## DISCUSSION

In this study, we established and characterized a rat model of high-dose edible cannabis poisoning. We observed higher serum and brain THC and 11-OH-THC levels in female rats compared to male rats after cannabis poisoning despite exposure to the same N-THC doses. The study also revealed sex- and time-dependent decreases in dHipp, Cg, and NAc gamma power over a 24-h period starting 2 h after cannabis poisoning. Time-dependent changes in the cannabinoid tetrad behaviors and active avoidance and PPI disruptions were also observed.

The observed sex difference in serum THC levels could be partly due to the rapid redistribution of the lipophilic THC to fatty tissues to a greater extent in males [45-47], who have more body

fat than females [48]. Similar to a previous study [49], we found sex differences in serum 11-OH-THC levels, suggesting differences in THC metabolism, possibly due to the sexually dimorphic expression of cytochrome P450 (CYP) enzymes [50, 51], resulting in THC being preferentially metabolized into 11-nor-9-carboxy- $\Delta^9$ -THC (11-COOH-THC) in males and into 11-OH-THC in females [52-54], leading to higher serum 11-OH-THC levels in females. We also observed lower brain THC and 11-OH-THC levels in males compared to females, which may be related to the lower serum levels of the parent compound in males. Further, male rat brains may be protected against THC through increased expression of blood brain barrier proteins (including claudin-5) [53, 54]. The rat brain expresses CYP enzymes that can also metabolize THC [55], suggesting that microsomes in female rats may metabolize more THC into 11-OH-THC, resulting in higher brain 11-OH-THC levels [43]. In general, the serum and brain 11-OH-THC levels decreased gradually over 24 h; while this may be due to its excretion [56], it could be because the 11-OH-THC is rapidly oxidized into 11-COOH-THC [57].

The local field potential power reflects the extent of neural synchrony, with higher power reflecting higher synchrony and vice versa [58]. Gamma power and synchrony is modulated by parvalbumin-expressing (PV) interneurons [59], which are modulated by cholecystikinin-expressing (CCK) interneurons [60], the only CB1R-expressing interneuron in the cortex and hippocampus [61-63]. THC binding to CCK interneuron CB1Rs affect PV interneuron activity, resulting in a disruption in gamma oscillations, and a subsequent gamma power decrease. This may explain the decreased gamma power observed following edible cannabis-induced poisoning in our rats [26, 64-66]. That these decreases in gamma power were observed in the dHipp, Cg, NAc, and PFC, is not surprising since these regions have high CB1R densities. In our study, significant edible cannabis-induced poisoning effects on gamma power began around the 2-h mark, which is consistent with the finding that the subjective behavioral effects



of edible cannabis peak between 1.5 and 3 h after ingestion [67, 68], as well as our pharmacokinetic findings. We also observed sex differences in NAc, Cg, and dHipp gamma power. This may be partly attributable to the high estrogen levels in female rats [69, 70], which increases the binding of estrogen to estrogen  $\beta$  receptors expressed by PV interneurons, leading to increased firing, greater inhibition, and increased gamma activity [71, 72]. This may explain the higher gamma power in female rats, which may also underlie the quicker recovery from the THC-induced suppression in females, where the 24-h time-points no longer showed THC effects.

The similarity in effects of THC on anti-nociception (tail flick latency) in males and females observed in our study was also reported in rats following THC vapor administration [39]. One of the most cited reasons for medical cannabis use is pain relief [73, 74]. The periaqueductal gray, a brain region that contains CB1R-expressing somatodendritic structures and presynaptic terminals [75-77], is involved in pain modulation [78], and may play a role in the decreased pain sensitivity we observed following edible cannabis-induced poisoning. Interestingly, the tail flick latency in female rats had returned to baseline levels, unlike that in male rats, 24 h after acute high-dose THC administration. We also observed edible cannabis-induced hypothermia in both males and females, which may be due to the interaction between THC and the preoptic area of the hypothalamus, a region involved in temperature regulation [79] and known to contain high densities of CB1Rs [80-82]. In female rats, both anti-nociception and body temperature had returned to baseline levels by the 24-h time-point, which could be due to the development of tolerance to the higher serum and brain THC and 11-OH-THC levels or the differential time-course of effects between the parent compound and metabolite. While no sex-differences in hypolocomotion was observed in our study, similar to the findings of a previous study [83], the hypolocomotion, which was also previously reported [84, 85], may be

due to the interaction between THC, 11-OH-THC, and CB1Rs on cerebellar basket cells [86]. Interestingly, the edible cannabis-induced tetrad effects began around the 2-h time-point, similar to the observed neural effects of cannabis poisoning in this study, which coincides with the time-point that cognitive and psychomotor deficits were observed in humans following edible cannabis ingestion [68]. This suggests that interventions to reverse the effects of edible cannabis-induced poisoning should target the 2-h time window.

The AAT and ASR were performed just before the 4-h time-point because the effects of edible cannabis on cognitive performance in humans were observed between 2 and 5 h post-ingestion [68]. We observed decreased hippocampal gamma power, which is necessary for learning the association between stimuli [25, 87, 88]. This could explain the inability of N-THC-treated rats to avoid the foot shock during the AAT. Our finding is consistent with those of previous studies that found learning deficits in cannabis users [89] and THC-treated rats [35]. While low dose THC (0.3 – 3 mg/kg) administration had no effect on PPI [90], a higher dose (10 mg/kg) disrupted PPI [31], similar to our findings in rats that received acute high-dose THC (20 mg/kg). This suggests the possibility of a dose-dependent effect of THC on PPI. A previous study reported decreased PPI in rats following the direct infusion of CB1R agonists into the hippocampus and PFC [34] and concluded that hippocampus and PFC CB1R activation modulates neural GABA and glutamate release, which affects the activities of PPI-mediating structures like the NAc and ventral tegmental area [34]. This conclusion is consistent with our finding of decreased PFC and dHipp gamma power following acute high-dose THC administration, which may have influenced NAc activity.

Although we report several novel findings, there are a number of limitations that are noteworthy. Firstly, we could only administer the high-dose THC once, since the rats consume

the Nutella voluntarily, but do not consume it after exposure to N-THC. Secondly, blood sampling to determine serum THC and 11-OH-THC levels began at the 4-h time-point, just after the AAT and ASR. This was done to ensure that the behavioral effects of the N-THC exposure would not be impacted by the blood sampling, but as a result we may have missed the peak THC and 11-OH-THC levels. Thirdly, although male rats metabolize THC preferentially into 11-COOH-THC, we did not evaluate serum and brain 11-COOH-THC levels. This will be done in future studies. Fourthly, while we chose to use full-spectrum THC oil to more closely mimic human edible cannabis products, we are unable to assess the impact of additional cannabinoids and terpenes in the cannabis oil on the outcomes measured here. Future studies exploring different types of cannabis oils with varying cannabinoid and terpenoid levels may help to clarify these effects. Fifthly, the estrous cycle phase was not assessed in the female rats, which may have impacted the behavioral and electrophysiological effects of edible cannabis. Future studies will be adequately powered to assess the impact of estrous cycle on cannabis poisoning. Lastly, while the model proposed here will be valuable, these findings will need to be extended to younger rats to more closely model cannabis poisoning in children.

In conclusion, edible cannabis-induced poisoning results in decreased gamma power, causes hypolocomotion, hypothermia, and anti-nociception, leads to learning deficits, and impairs PPI. While it is not surprising that cannabis poisoning has neural and behavioral effects, this is the first study to show these effects using edible cannabis, which is increasingly becoming popular among cannabis users and is the most cited cannabis product associated with cannabis poisoning, especially in children and pets. Interestingly, the neural and behavioral effects of edible cannabis-induced poisoning begun after 2 h, which coincides with the period when the peak effects of edible cannabis on cognitive processes were reported. This suggests that

administering interventions during this time window may be key to reversing the effects of cannabis poisoning. Moreover, the sex differences in gamma power and serum and brain THC and 11-OH-THC levels following cannabis poisoning suggests sex differences in the effects of THC and its metabolism, which should be considered for the development of effective treatments.

## **AUTHOR CONTRIBUTIONS**

RQA contributed to the design of the work; acquisition, analysis, interpretation of the data; and drafting and revising the manuscript. HK contributed to the design of the work, acquisition of the data, and revising the manuscript. MAT contributed to the acquisition of the data. AH contributed to the acquisition of the data. YG contributed to the acquisition, analysis, and interpretation of the data. RJ contributed to the acquisition, analysis, and interpretation of the data. KU contributed to the conception of the work, interpretation of the data, and revision of the manuscript. JYK contributed to the conception and design of the work, analysis and interpretation of the data, and the drafting and revision of the manuscript. All authors have approved the final version of the manuscript to be published and agree to be accountable for all aspects of the work in ensuring that questions related to the accuracy and integrity of any part of the work are appropriately investigated and resolved.

## **FUNDING**

This research was funded by a Natural Sciences and Engineering Research Council Alliance Grant (ALLRP 549529 to JYK) and a MITACS Accelerate Fellowship (IT27597 to RQA and JYK) in partnership with Avicanna Inc. The funders had no role in the design, data collection and analysis, decision to publish, or preparation of the manuscript.

## COMPETING INTERESTS

Dr. Urban is an employee of Avicanna Inc., during which time she has received stock options.

Avicanna Inc. did not influence the design, conduct, or interpretation of the data derived from this study. None of the other authors have any disclosures.

## REFERENCES

1. Borodovsky, J.T., et al., *Smoking, vaping, eating: Is legalization impacting the way people use cannabis?* International Journal of Drug Policy, 2016. **36**: p. 141-147.
2. Knapp, A.A., et al., *Emerging trends in cannabis administration among adolescent cannabis users.* Journal of Adolescent Health, 2019. **64**(4): p. 487-493.
3. Schauer, G.L., et al., *Toking, vaping, and eating for health or fun: marijuana use patterns in adults, US, 2014.* American journal of preventive medicine, 2016. **50**(1): p. 1-8.
4. Steigerwald, S., et al., *Smoking, vaping, and use of edibles and other forms of marijuana among US adults.* Annals of internal medicine, 2018. **169**(12): p. 890-892.
5. Weiss, S., *Edibles: for experts only? Ingesting marijuana, as opposed to smoking it, has come a long way since the days of homemade pot brownies.* State Legis, 2015. **41**(3): p. 23.
6. Meola, S.D., et al., *Evaluation of trends in marijuana toxicosis in dogs living in a state with legalized medical marijuana: 125 dogs (2005–2010).* Journal of Veterinary Emergency and Critical Care, 2012. **22**(6): p. 690-696.
7. Bennett, C.E., et al., *Recent trends in marijuana-related hospital encounters in young children.* Academic pediatrics, 2021.

8. Myran, D.T., et al., *Unintentional pediatric cannabis exposures after legalization of recreational cannabis in Canada*. JAMA network open, 2022. **5**(1): p. e2142521-e2142521.
9. Tweet, M.S., A. Nemanich, and M. Wahl, *Pediatric Edible Cannabis Exposures and Acute Toxicity: 2017–2021*. Pediatrics, 2023.
10. Wang, G.S., et al., *Unintentional pediatric exposures to marijuana in Colorado, 2009–2015*. JAMA pediatrics, 2016. **170**(9): p. e160971-e160971.
11. Wang, G.S., G. Roosevelt, and K. Heard, *Pediatric marijuana exposures in a medical marijuana state*. JAMA pediatrics, 2013. **167**(7): p. 630-633.
12. Animal Posion Control Center. *Marijuana Toxicosis in Animals*. 2019 [cited 2021 June 29]; Available from: <https://www.aspcapro.org/resource/shelter-health-poison-control/marijuana-toxicosis-animals>.
13. Quansah Amissah, R., et al., *Prevalence and characteristics of cannabis-induced toxicoses in pets: Results from a survey of veterinarians in North America*. PLoS One, 2022. **17**(4): p. e0261909.
14. Janczyk, P., C.W. Donaldson, and S. Gwaltney, *Two hundred and thirteen cases of marijuana toxicoses in dogs*. Veterinary and human toxicology, 2004. **46**(1): p. 19-20.
15. Claudet, I., et al., *Unintentional cannabis intoxication in toddlers*. Pediatrics, 2017. **140**(3).
16. Mura, P., et al., *THC can be detected in brain while absent in blood*. J Anal Toxicol, 2005. **29**(8): p. 842-3.
17. Hollister, L.E., *Structure-activity relationships in man of cannabis constituents, and homologs and metabolites of delta9-tetrahydrocannabinol*. Pharmacology, 1974. **11**(1): p. 3-11.

18. Hollister, L.E., et al., *Do plasma concentrations of delta 9-tetrahydrocannabinol reflect the degree of intoxication?* J Clin Pharmacol, 1981. **21**(S1): p. 171s-177s.
19. Favrat, B., et al., *Two cases of "cannabis acute psychosis" following the administration of oral cannabis.* BMC Psychiatry, 2005. **5**: p. 17.
20. Hložek, T., et al., *Pharmacokinetic and behavioural profile of THC, CBD, and THC+ CBD combination after pulmonary, oral, and subcutaneous administration in rats and confirmation of conversion in vivo of CBD to THC.* European Neuropsychopharmacology, 2017. **27**(12): p. 1223-1237.
21. Hudak, M., D. Severn, and K. Nordstrom, *Edible Cannabis-Induced Psychosis: Intoxication and Beyond.* Am J Psychiatry, 2015. **172**(9): p. 911-2.
22. Robbe, D., et al., *Cannabinoids reveal importance of spike timing coordination in hippocampal function.* Nature neuroscience, 2006. **9**(12): p. 1526-1533.
23. Cortes-Briones, J., et al.,  *$\Delta$  9-THC disrupts gamma ( $\gamma$ )-band neural oscillations in humans.* Neuropsychopharmacology, 2015. **40**(9): p. 2124-2134.
24. Radhakrishnan, R., S.T. Wilkinson, and D.C. D'Souza, *Gone to pot—a review of the association between cannabis and psychosis.* Frontiers in psychiatry, 2014. **5**: p. 54.
25. Uhlhaas, P.J., et al., *The role of oscillations and synchrony in cortical networks and their putative relevance for the pathophysiology of schizophrenia.* Schizophrenia bulletin, 2008. **34**(5): p. 927-943.
26. Nelong, T.F., et al., *Extended attenuation of corticostriatal power and coherence after acute exposure to vapourized  $\Delta$ 9 tetrahydrocannabinol in rats.* The Canadian journal of addiction, 2019. **10**(3): p. 60.
27. Graham, F.K., *The more or less startling effects of weak prestimulation.* Psychophysiology, 1975. **12**(3): p. 238-248.

28. Braff, D.L. and M.A. Geyer, *Sensorimotor gating and schizophrenia: human and animal model studies*. Archives of general psychiatry, 1990. **47**(2): p. 181-188.
29. Kedzior, K.K. and M.T. Martin-Iverson, *Attention-dependent reduction in prepulse inhibition of the startle reflex in cannabis users and schizophrenia patients—a pilot study*. European Journal of Pharmacology, 2007. **560**(2-3): p. 176-182.
30. Scholes, K.E. and M.T. Martin-Iverson, *Alterations to pre-pulse inhibition (PPI) in chronic cannabis users are secondary to sustained attention deficits*. Psychopharmacology, 2009. **207**(3): p. 469-484.
31. Nagai, H., et al., *Antipsychotics improve  $\Delta$ 9-tetrahydrocannabinol-induced impairment of the prepulse inhibition of the startle reflex in mice*. Pharmacology Biochemistry and Behavior, 2006. **84**(2): p. 330-336.
32. Schneider, M., E. Drews, and M. Koch, *Behavioral effects in adult rats of chronic prepubertal treatment with the cannabinoid receptor agonist WIN 55,212-2*. Behavioural pharmacology, 2005. **16**(5-6): p. 447-453.
33. Schneider, M. and M. Koch, *The cannabinoid agonist WIN 55,212-2 reduces sensorimotor gating and recognition memory in rats*. Behavioural pharmacology, 2002. **13**(1): p. 29-37.
34. Wegener, N., et al., *Effects of acute systemic and intra-cerebral stimulation of cannabinoid receptors on sensorimotor gating, locomotion and spatial memory in rats*. Psychopharmacology, 2008. **198**(3): p. 375-385.
35. Mishima, K., et al., *Characteristics of learning and memory impairment induced by  $\Delta$ 9-tetrahydrocannabinol in rats*. Japanese journal of pharmacology, 2001. **87**(4): p. 297-308.
36. Metna-Laurent, M., et al., *Cannabinoid-induced tetrad in mice*. Current Protocols in Neuroscience, 2017. **80**(1): p. 9.59. 1-9.59. 10.



37. Compton, D., et al., *Cannabinoid structure-activity relationships: correlation of receptor binding and in vivo activities*. Journal of Pharmacology and Experimental Therapeutics, 1993. **265**(1): p. 218-226.
38. Moore, C.F. and E.M. Weerts, *Cannabinoid tetrad effects of oral  $\Delta$ 9-tetrahydrocannabinol (THC) and cannabidiol (CBD) in male and female rats: sex, dose-effects and time course evaluations*. Psychopharmacology, 2022. **239**(5): p. 1397-1408.
39. Moore, C.F., et al., *Appetitive, antinociceptive, and hypothermic effects of vaped and injected  $\Delta$ 9-tetrahydrocannabinol (THC) in rats: exposure and dose-effect comparisons by strain and sex*. Pharmacology Biochemistry and Behavior, 2021. **202**: p. 173116.
40. English, A., et al., *A preclinical model of THC edibles that produces high-dose cannabimimetic responses*. bioRxiv, 2022.
41. Craft, R.M., et al., *Gonadal hormone modulation of  $\Delta$ (9)-tetrahydrocannabinol-induced antinociception and metabolism in female versus male rats*. Pharmacol Biochem Behav, 2017. **152**: p. 36-43.
42. Craft, R.M., R. Kandasamy, and S.M. Davis, *Sex differences in anti-allodynic, anti-hyperalgesic and anti-edema effects of  $\Delta$ (9)-tetrahydrocannabinol in the rat*. Pain, 2013. **154**(9): p. 1709-1717.
43. Wiley, J.L. and J.J. Burston, *Sex differences in  $\Delta$ (9)-tetrahydrocannabinol metabolism and in vivo pharmacology following acute and repeated dosing in adolescent rats*. Neurosci Lett, 2014. **576**: p. 51-5.
44. Noble, M.J., K. Hedberg, and R.G. Hendrickson, *Acute cannabis toxicity*. Clinical toxicology, 2019. **57**(8): p. 735-742.

45. Thomas, B.F., D.R. Compton, and B.R. Martin, *Characterization of the lipophilicity of natural and synthetic analogs of delta 9-tetrahydrocannabinol and its relationship to pharmacological potency*. *Journal of Pharmacology and Experimental Therapeutics*, 1990. **255**(2): p. 624-630.
46. Nahas, G., et al., *The kinetics of cannabinoid distribution and storage with special reference to the brain and testis*. *The Journal of Clinical Pharmacology*, 1981. **21**(S1): p. 208S-214S.
47. Willinsky, M.D., et al., *Distribution and metabolism in vivo of 14C-tetrahydrocannabinol in the rat*. *European journal of pharmacology*, 1974. **27**(1): p. 106-119.
48. Cortright, R.N., et al., *Daily exercise reduces fat, protein and body mass in male but not female rats*. *Physiology & behavior*, 1997. **62**(1): p. 105-111.
49. Ruiz, C.M., et al., *Pharmacokinetic, behavioral, and brain activity effects of Δ9-tetrahydrocannabinol in adolescent male and female rats*. *Neuropsychopharmacology*, 2021. **46**(5): p. 959-969.
50. Gerges, S.H. and A.O. El-Kadi, *Sexual dimorphism in the expression of cytochrome P450 enzymes in rat heart, liver, kidney, lung, brain, and small intestine*. *Drug Metabolism and Disposition*, 2023. **51**(1): p. 81-94.
51. Sholler, D.J., et al., *Sex differences in the acute effects of oral and vaporized cannabis among healthy adults*. *Addict Biol*, 2021. **26**(4): p. e12968.
52. Narimatsu, S., et al., *Cytochrome P-450 isozymes in metabolic activation of delta 9-tetrahydrocannabinol by rat liver microsomes*. *Drug metabolism and disposition*, 1990. **18**(6): p. 943-948.

53. Torrens, A., et al., *Comparative Pharmacokinetics of  $\Delta$ 9-Tetrahydrocannabinol in Adolescent and Adult Male and Female Rats*. Cannabis and Cannabinoid Research, 2022.
54. Torrens, A., et al., *Comparative pharmacokinetics of  $\Delta$ 9-tetrahydrocannabinol in adolescent and adult male mice*. Journal of Pharmacology and Experimental Therapeutics, 2020. **374**(1): p. 151-160.
55. Watanabe, K., et al., *Brain microsomal oxidation of  $\Delta$ 8- and  $\Delta$ 9-tetrahydrocannabinol*. Biochemical and biophysical research communications, 1988. **157**(1): p. 75-80.
56. Wall, M.E., et al., *Metabolism, disposition, and kinetics of delta-9-tetrahydrocannabinol in men and women*. Clin Pharmacol Ther, 1983. **34**(3): p. 352-63.
57. Andrenyak, D.M., et al., *Determination of  $\Delta$ -9-Tetrahydrocannabinol (THC), 11-hydroxy-THC, 11-nor-9-carboxy-THC and Cannabidiol in Human Plasma using Gas Chromatography-Tandem Mass Spectrometry*. J Anal Toxicol, 2017. **41**(4): p. 277-288.
58. Luo, W. and J.-S. Guan, *Do brain oscillations orchestrate memory?* Brain Science Advances, 2018. **4**(1): p. 16-33.
59. Volman, V., M.M. Behrens, and T.J. Sejnowski, *Downregulation of parvalbumin at cortical GABA synapses reduces network gamma oscillatory activity*. Journal of Neuroscience, 2011. **31**(49): p. 18137-18148.
60. Karson, M.A., et al., *Synaptic cross talk between perisomatic-targeting interneuron classes expressing cholecystinin and parvalbumin in hippocampus*. Journal of Neuroscience, 2009. **29**(13): p. 4140-4154.
61. Bodor, Á.L., et al., *Endocannabinoid signaling in rat somatosensory cortex: laminar differences and involvement of specific interneuron types*. Journal of Neuroscience, 2005. **25**(29): p. 6845-6856.

62. Eggan, S.M. and D.A. Lewis, *Immunocytochemical distribution of the cannabinoid CB1 receptor in the primate neocortex: a regional and laminar analysis*. Cerebral cortex, 2007. **17**(1): p. 175-191.
63. Tsou, K., et al., *Cannabinoid CB1 receptors are localized primarily on cholecystikinin-containing GABAergic interneurons in the rat hippocampal formation*. Neuroscience, 1999. **93**(3): p. 969-975.
64. Hajós, M., W.E. Hoffmann, and B. Kocsis, *Activation of cannabinoid-1 receptors disrupts sensory gating and neuronal oscillation: relevance to schizophrenia*. Biological psychiatry, 2008. **63**(11): p. 1075-1083.
65. Hájos, N., et al., *Cannabinoids inhibit hippocampal GABAergic transmission and network oscillations*. European Journal of Neuroscience, 2000. **12**(9): p. 3239-3249.
66. Jenkins, B.W., et al., *Cannabis Vapor Exposure Alters Neural Circuit Oscillatory Activity in a Neurodevelopmental Model of Schizophrenia: Exploring the Differential Impact of Cannabis Constituents*. Schizophrenia Bulletin Open, 2022. **3**(1): p. sgab052.
67. Vandrey, R., et al., *Pharmacokinetic profile of oral cannabis in humans: blood and oral fluid disposition and relation to pharmacodynamic outcomes*. Journal of analytical toxicology, 2017. **41**(2): p. 83-99.
68. Schlienz, N.J., et al., *Pharmacodynamic dose effects of oral cannabis ingestion in healthy adults who infrequently use cannabis*. Drug and alcohol dependence, 2020. **211**: p. 107969.
69. Milad, M.R., et al., *Estrous cycle phase and gonadal hormones influence conditioned fear extinction*. Neuroscience, 2009. **164**(3): p. 887-95.
70. Bao, J., et al., *Sex Differences in the Cognitive and Hippocampal Effects of Streptozotocin in an Animal Model of Sporadic AD*. Front Aging Neurosci, 2017. **9**: p. 347.

71. Clemens, A.M., et al., *Estrus-cycle regulation of cortical inhibition*. Current Biology, 2019. **29**(4): p. 605-615. e6.
72. Sohal, V.S., et al., *Parvalbumin neurons and gamma rhythms enhance cortical circuit performance*. Nature, 2009. **459**(7247): p. 698-702.
73. MischleyLaurie, K., *Sex differences in cannabis use and effects: a cross-sectional survey of cannabis users*. Cannabis and cannabinoid research, 2016.
74. Reinerman, C., et al., *Who are medical marijuana patients? Population characteristics from nine California assessment clinics*. Journal of psychoactive drugs, 2011. **43**(2): p. 128-135.
75. Burston, J.J., et al., *Regional enhancement of cannabinoid CB1 receptor desensitization in female adolescent rats following repeated  $\Delta$ 9-tetrahydrocannabinol exposure*. British journal of pharmacology, 2010. **161**(1): p. 103-112.
76. Wilson-Poe, A., et al., *Distribution of CB1 cannabinoid receptors and their relationship with mu-opioid receptors in the rat periaqueductal gray*. Neuroscience, 2012. **213**: p. 191-200.
77. An, X., et al., *Prefrontal cortical projections to longitudinal columns in the midbrain periaqueductal gray in macaque monkeys*. Journal of Comparative Neurology, 1998. **401**(4): p. 455-479.
78. Reynolds, D.V., *Surgery in the rat during electrical analgesia induced by focal brain stimulation*. Science, 1969. **164**(3878): p. 444-445.
79. Ripamonte, G.C., et al., *Functional role for preoptic CB1 receptors in breathing and thermal control*. Neuroscience Letters, 2020. **732**: p. 135021.
80. Kuster, J.E., et al., *Aminoalkylindole binding in rat cerebellum: selective displacement by natural and synthetic cannabinoids*. Journal of Pharmacology and Experimental Therapeutics, 1993. **264**(3): p. 1352-1363.

81. Moldrich, G. and T. Wenger, *Localization of the CB1 cannabinoid receptor in the rat brain. An immunohistochemical study* ☆. *Peptides*, 2000. **21**(11): p. 1735-1742.
82. Wittmann, G., et al., *Distribution of type 1 cannabinoid receptor (CB1)-immunoreactive axons in the mouse hypothalamus*. *Journal of Comparative Neurology*, 2007. **503**(2): p. 270-279.
83. Wiley, J.L., et al., *Pharmacological effects of acute and repeated administration of  $\Delta^9$ -tetrahydrocannabinol in adolescent and adult rats*. *Journal of Pharmacology and Experimental Therapeutics*, 2007. **320**(3): p. 1097-1105.
84. Drews, E., M. Schneider, and M. Koch, *Effects of the cannabinoid receptor agonist WIN 55,212-2 on operant behavior and locomotor activity in rats*. *Pharmacology Biochemistry and Behavior*, 2005. **80**(1): p. 145-150.
85. de Fonseca, F.R., et al., *Role of the endogenous cannabinoid system in the regulation of motor activity*. *Neurobiology of disease*, 1998. **5**(6): p. 483-501.
86. Patel, S. and C.J. Hillard, *Cannabinoid CB1 receptor agonists produce cerebellar dysfunction in mice*. *Journal of Pharmacology and Experimental Therapeutics*, 2001. **297**(2): p. 629-637.
87. Howard, M.W., et al., *Gamma oscillations correlate with working memory load in humans*. *Cerebral cortex*, 2003. **13**(12): p. 1369-1374.
88. Trimper, J.B., et al., *Gamma oscillations in rat hippocampal subregions dentate gyrus, CA3, CA1, and subiculum underlie associative memory encoding*. *Cell reports*, 2017. **21**(9): p. 2419-2432.
89. Skosnik, P.D., et al., *The effect of chronic cannabinoids on broadband EEG neural oscillations in humans*. *Neuropsychopharmacology*, 2012. **37**(10): p. 2184-2193.
90. Malone, D.T. and D.A. Taylor, *The effect of  $\Delta^9$ -tetrahydrocannabinol on sensorimotor gating in socially isolated rats*. *Behavioural brain research*, 2006. **166**(1): p. 101-109.
